# Supplementary material for: Safety and efficacy of oral antiplatelet for patients who had acute ischaemic stroke undergoing endovascular therapy
Source: PubMed Central journal article supplement — Stroke Vasc Neurol. 2020 Nov 11;6(2):230–7. doi: 10.1136/svn-2020-000466 (PMC8258061; doi:10.1136/svn-2020-000466), 2020-11-11
Supplement: svn-2020-000466supp001.pdf [file svn-2020-000466supp001.pdf]

**Supplementary Table 1. Comparison with previous study antiplatelet pretreatment in AIS patients with LVO received EVT**

| Variables                                 | Pandhi et al           |                             | Mulder et al (MR CLEAN) |                             | Merlino et al          |                            | Present study           |                             |
|-------------------------------------------|------------------------|-----------------------------|-------------------------|-----------------------------|------------------------|----------------------------|-------------------------|-----------------------------|
|                                           | Antiplatelet<br>(n=71) | Non-antiplatelet<br>(n=146) | Antiplatelet<br>(n=144) | Non-antiplatelet<br>(n=356) | Antiplatelet<br>(n=34) | Non-antiplatelet<br>(n=66) | Antiplatelet<br>(n=199) | Non-antiplatelet<br>(n=716) |
| Age, mean $\pm$ SD, years or median (IQR) | 60 $\pm$ 14            | 66 $\pm$ 14                 | 71(62-78)               | 63(53-74)                   | 73.9 $\pm$ 9           | 68.5 $\pm$ 11.8            | 62(55-69)               | 64(55-73)                   |
| Male, n(%)                                | 35(49)                 | 73(50)                      | 96(67)                  | 196(55)                     | 20(58.8)               | 38(57.6)                   | 146(73.4)               | 465(64.9)                   |
| Vascular risk factors                     |                        |                             |                         |                             |                        |                            |                         |                             |
| Hypertension                              | 66(93)                 | 100(68)                     | 98(68)                  | 129(36)                     | 30(88.2)               | 37(56.1)                   | 121(60.8)               | 378(52.8)                   |
| Diabetes mellitus                         | 37(52)                 | 33(23)                      | 26(18)                  | 42(12)                      | 9(26.5)                | 9(13.6)                    | 33(16.6)                | 112(15.6)                   |
| Atrial fibrillation                       | 22(31)                 | 32(22)                      | 49(34)                  | 86(24)                      | 14(41.2)               | 27(40.9)                   | 29(14.6)                | 135(18.9)                   |
| Previous stroke                           | N/A                    | N/A                         | 40(28)                  | 14(4)                       | 4(11.8)                | 1(1.5)                     | 22(11.1)                | 75(10.5)                    |
| Smoking                                   | 22(31)                 | 41(28)                      | 42(29)                  | 101(28)                     | 4(11.8)                | 6(9.1)                     | 67(33.7)                | 244(34.1)                   |
| NIHSS score, median (IQR)                 | 16(12-21)              | 17(12-20)                   | 18(15-22)               | 18(14-22)                   | 20(17.5-23)            | 16(11-19)                  | 15(10-20)               | 14(9-20)                    |
| ASPECTS, median (IQR)                     | 10(9-10)               | 10(8-10)                    | 9(8-10)                 | 9(7-10)                     | NA                     | NA                         | 8(7-8)                  | 8(7-8)                      |
| Atherosclerotic disease, n(%)             | 22(31)                 | 48(33)                      | N/A                     | N/A                         | 8(23.5)                | 9(13.6)                    | 148(74.4)               | 501(70)                     |
| Cardioembolism                            | N/A                    | N/A                         | N/A                     | N/A                         | 15(44.1)               | 28(42.4)                   | 30(15.1)                | 138(19.3)                   |
| IVT                                       | 47(66)                 | 94(64)                      | N/A                     | N/A                         | 22(64.7)               | 38(57.6)                   | 30(15.1)                | 211(29.5)                   |
| OTP, mean (SD)                            | 310(204)               | 317(179)                    | N/A                     | N/A                         | 202.8 $\pm$ 64.5       | 252.1 $\pm$ 91.3           | 345(201-460)            | 310(220-430)                |
| OTR, median (IQR)                         | N/A                    | N/A                         | 342(278-410)            | 339(271-393)                | N/A                    | N/A                        | 417.5(300-562.5)        | 400(301.5-530)              |
| PTR, median (IQR)                         | N/A                    | N/A                         | 68(47-93)               | 73(52-101)                  | 88.8 $\pm$ 41.4        | 86.8 $\pm$ 38.9            | 70(44.25-110)           | 80(55-115)                  |
| Safety outcomes                           |                        |                             |                         |                             |                        |                            |                         |                             |
| sICH                                      | 4(6)                   | 10(7)                       | 11(17)                  | 7(4)                        | 1(2.9)                 | 4(6.1)                     | 7(3.5)                  | 44(6.1)                     |
| 3-month mortality                         | 18(25)                 | 38(26)                      | 21(33)                  | 28(17)                      | 11(32.4)               | 10(15.2)                   | 33(16.6)                | 127(17.7)                   |
| Efficacy outcomes                         |                        |                             |                         |                             |                        |                            |                         |                             |
| Successful recanalization, (n%)           | N/A                    | N/A                         | 32/54(59)               | 84/143(59)                  | 31(91.2)               | 49(74.2)                   | 188(94.5)               | 650(90.8)                   |
| Complete recanalization, n(%)             | 55(77)                 | 89(61)                      | N/A                     | N/A                         | N/A                    | N/A                        | 154(77.4)               | 488(68.2)                   |
| Functional independence (mRS0-2)          | 33(50)                 | 64(48)                      | 15(23)                  | 61(36)                      | 6(17.6)                | 26(39.4)                   | 101(50.8)               | 372(52)                     |

Abbreviation: SD, standard deviation; SBP, systolic blood pressure; IQR, interquartile range; NIHSS, National Institutes of Health Stroke Scale score; ASPECTS, Alberta Stroke Program Early CT score; OTP, onset-to-puncture; OTR, onset-to-recanalization; PTR, puncture-to-recanalization; IVT, intravenous thrombolysis; sICH, symptomatic intracranial hemorrhage; mRS, modified Rankin Scale.
